# Supplementary material
Source: PubMed Central journal article supplement (PMC4692134)
Supplement: Supp_Fig1.pdf [file Supp_Fig1.pdf]

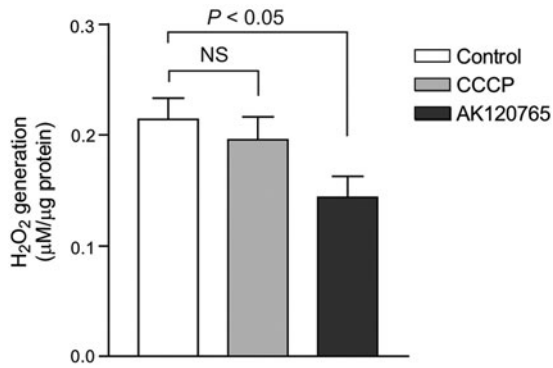

**SUPPLEMENTARY FIG. S1. Effect of CCCP and AK120765 on H<sub>2</sub>O<sub>2</sub> levels in wild-type VSMCs from 16-month-old mice at basal conditions.** H<sub>2</sub>O<sub>2</sub> levels were determined in VSMCs in the presence or absence of 2 μM CCCP or 10 μM AK120765 using Amplex Red assay. AK120765, 2-(2-chlorophenyl)-4-methyl-5-(pyridin-2-ylmethyl)-1H-pyrazolo [4,3-c]pyridine-3,6(2H,5H)-dione; CCCP, carbonyl cyanide *m*-chlorophenylhydrazone; NS, not significant; VSMC, vascular smooth muscle cell.
