# Supplementary material
Source: PubMed Central journal article supplement (PMC4692134)
Supplement: Supp_Fig2.pdf [file Supp_Fig2.pdf]

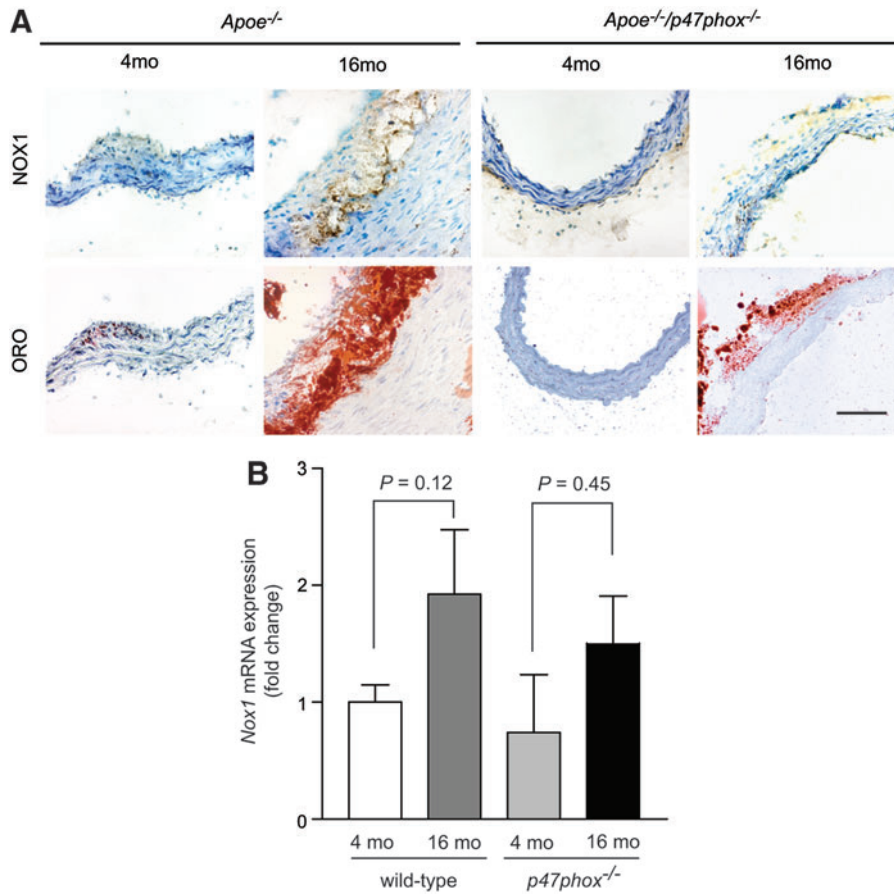

**SUPPLEMENTARY FIG. S2.** Changes in NOX1 expression with age in the aortic wall of 4- and 16-month-old *ApoE*<sup>-/-</sup> and *ApoE*<sup>-/-</sup>/*p47phox*<sup>-/-</sup> mice and in VSMCs from 4- and 16-month-old wild-type and *p47phox*<sup>-/-</sup> mice. (A) Representative aortic sections were stained for immunoreactive NOX1 and with Oil Red O. Scale is 100  $\mu$ m. (B) Real-time reverse transcription–polymerase chain reaction analysis of VSMC *Nox1* mRNA levels. NOX, NADPH oxidase.
