# Supplementary material
Source: PubMed Central journal article supplement (PMC4692134)
Supplement: Supp_Fig3.pdf [file Supp_Fig3.pdf]

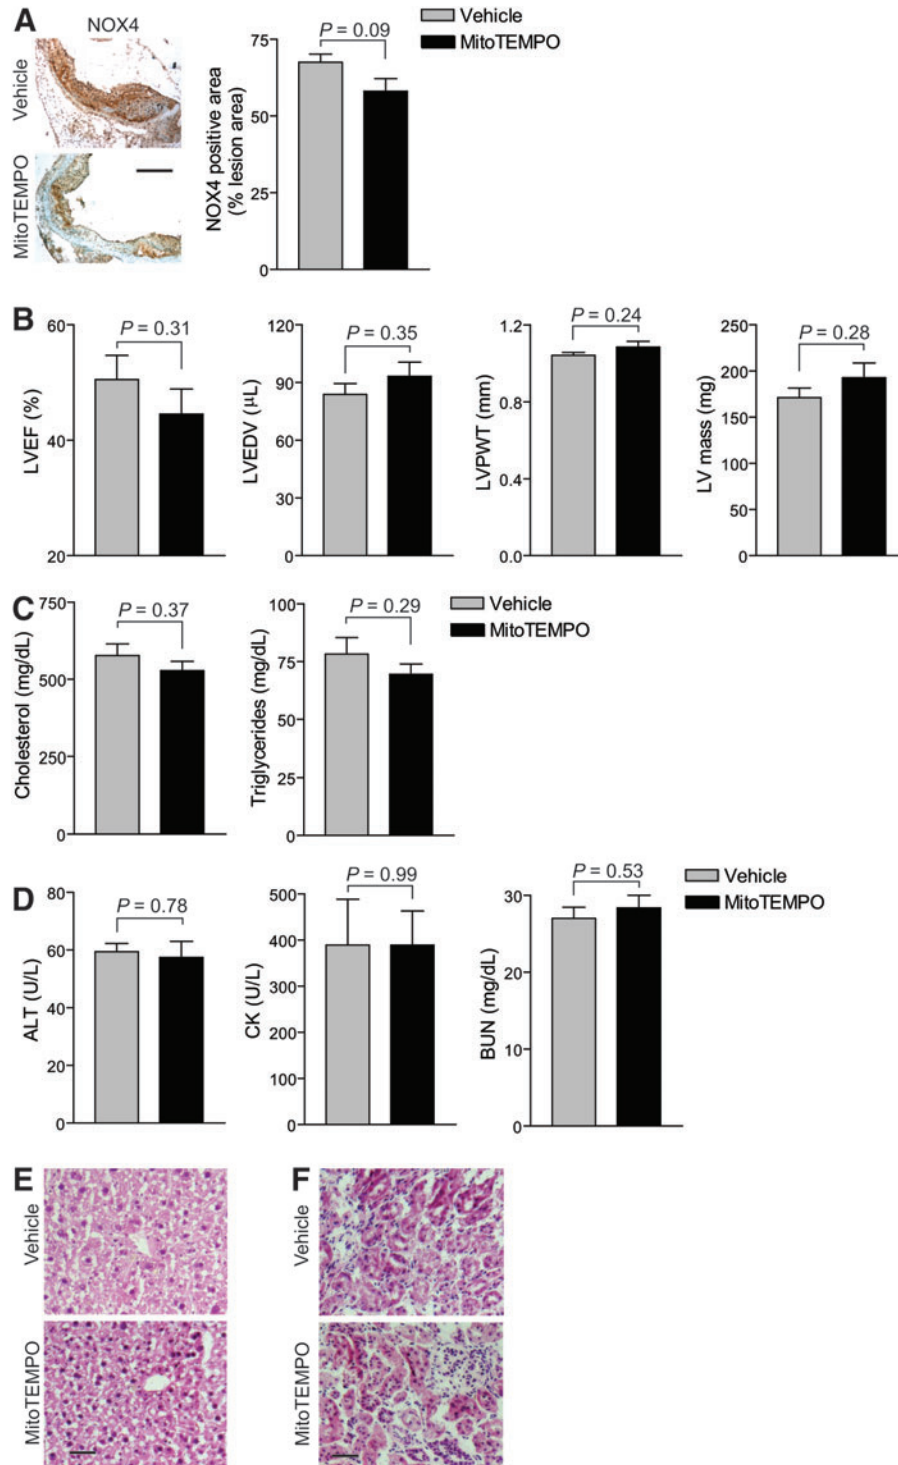

**SUPPLEMENTARY FIG. S3. Effects of MitoTEMPO treatment in aged *Apoe*<sup>-/-</sup> mice.** (A) Representative aortic sinus sections were stained for immunoreactive NOX4. Immunohistochemistry scoring of NOX4 levels (mean  $\pm$  SEM,  $n=8$ ). Scale is 100  $\mu\text{m}$ . (B) LVEF, LVEDV, LVPWT, and calculated LV mass were determined by echocardiography and are presented as mean  $\pm$  SEM ( $n=8$ ). (C) Plasma cholesterol and triglyceride levels (mean  $\pm$  SEM,  $n=8$ ). (D) Plasma ALT, CK, and BUN levels (mean  $\pm$  SEM,  $n=8$ ). (E) Representative images of H&E-stained liver sections. Scale is 100  $\mu\text{m}$ . (F) Representative images of H&E-stained kidney sections. Scale is 100  $\mu\text{m}$ . ALT, alanine aminotransferase; BUN, blood urea nitrogen; CK, creatine kinase; H&E, hematoxylin and eosin; LV mass, left ventricle mass; LVEDV, left ventricle end-diastolic volume; LVEF, left ventricle ejection fraction; LVPWT, left ventricle posterior wall thickness; MitoTEMPO, (2-(2,2,6,6-tetramethylpiperidin-1-oxyl-4-ylamino)-2-oxoethyl)triphenylphosphonium chloride; SEM, standard error of the mean.
