# Supplementary material
Source: PubMed Central journal article supplement (PMC4692134)
Supplement: Supp_Fig4.pdf [file Supp_Fig4.pdf]

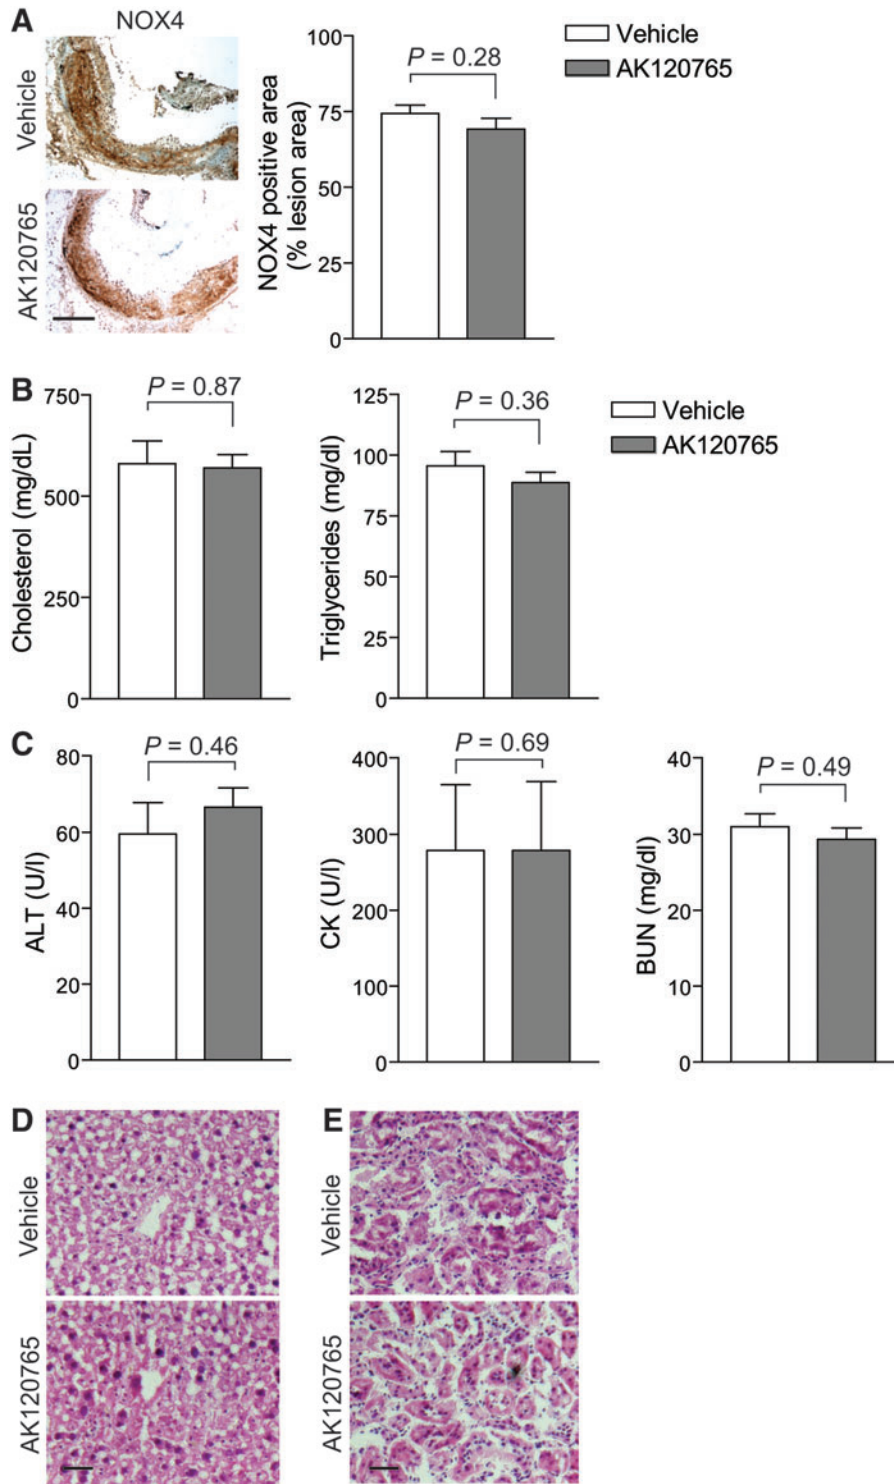

**SUPPLEMENTARY FIG. S4. Effects of AK120765 treatment in aged *Apoe*<sup>-/-</sup> mice.** (A) Representative aortic sinus sections were stained for immunoreactive NOX4. Immunohistochemistry scoring of NOX4 levels (mean  $\pm$  SEM,  $n = 7$ ). Scale is 100  $\mu$ m. (B) Plasma cholesterol and triglyceride levels (mean  $\pm$  SEM,  $n = 7$ ). (C) Plasma ALT, CK, and BUN levels (mean  $\pm$  SEM,  $n = 7$ ). (D) Representative images of H&E-stained liver sections. Scale is 100  $\mu$ m. (E) Representative images of H&E-stained kidney sections. Scale is 100  $\mu$ m.
