# Supplementary material
Source: PubMed Central journal article supplement (PMC4692134)
Supplement: Supp_Table1.pdf [file Supp_Table1.pdf]

## Supplementary Data

SUPPLEMENTARY TABLE S1. PLASMA LIPID LEVELS IN YOUNG (4-MONTH-OLD) AND AGED (16-MONTH-OLD) *APOE*<sup>-/-</sup> AND *APOE*<sup>-/-</sup>/*p47PHOX*<sup>-/-</sup> MICE ON NORMAL CHOW OR WESTERN DIET

|               | <i>ApoE</i> <sup>-/-</sup><br>ND 4 mo | <i>ApoE</i> <sup>-/-</sup><br>WD 4 mo | <i>ApoE</i> <sup>-/-</sup><br>ND 16 mo | <i>ApoE</i> <sup>-/-</sup><br>WD 16 mo | <i>ApoE</i> <sup>-/-</sup> /<br><i>p47phox</i> <sup>-/-</sup><br>ND 4 mo | <i>ApoE</i> <sup>-/-</sup> /<br><i>p47phox</i> <sup>-/-</sup><br>WD 4 mo | <i>ApoE</i> <sup>-/-</sup> /<br><i>p47phox</i> <sup>-/-</sup><br>ND 16 mo | <i>ApoE</i> <sup>-/-</sup> /<br><i>p47phox</i> <sup>-/-</sup><br>WD 16 mo |
|---------------|---------------------------------------|---------------------------------------|----------------------------------------|----------------------------------------|--------------------------------------------------------------------------|--------------------------------------------------------------------------|---------------------------------------------------------------------------|---------------------------------------------------------------------------|
| Cholesterol   | 441.8±44.21                           | 524.4±60.87                           | 401.8±91.42                            | 516.8±67.89                            | 449.6±53.07                                                              | 412.7±74.73                                                              | 428.2±48.21                                                               | 423.5±103.6                                                               |
| Triglycerides | 87.75±10.26                           | 87.93±6.539                           | 105.4±6.554                            | 93.83±14.96                            | 95.60±8.085                                                              | 86.20±6.048                                                              | 87.50±18.90                                                               | 101.3±14.77                                                               |

Cholesterol and triglyceride levels presented as mean±SEM (*n*=15). The differences between groups were not significant (one-way ANOVA).

ANOVA, analysis of variance; mo, month-old; ND, normal chow diet; SEM, standard error of the mean; WD, Western diet.
